# Supplementary material
Source: ML conference proceedings conference paper supplement (https://openaccess.thecvf.com/content/CVPR2022/html/Yu_Finding_Good_Configurations_CVPR_2022_paper.html)
Supplement: Supplementary file 1 [file Yu_Finding_Good_Configurations_CVPR_2022_supplemental.zip]

# Finding Good Configurations of Planar Primitives in Unorganized Point Clouds

## Supplementary Material

Mulin Yu      Florent Lafarge  
Inria - Université Côte d’Azur

This supplementary material presents additional experiments with (i) visual results of planar primitive fitting from a variety of input point clouds, (ii) an example of object approximation at different levels of details, (iii) qualitative and quantitative comparisons with seven compact mesh reconstruction methods on the KSR42 dataset [1] and (iv) quantitative results with different fidelity metrics.

### 1. Additional visual results

Figure 1 shows results from a variety of input point clouds that differ in terms of (i) objects with buildings, mechanical pieces, furniture elements, statues and vehicles, and (ii) acquisition sensors with MVS-based point clouds, laser scans and points sampled from CAD models.

### 2. Reconstruction at different levels of details

Figure 2 shows an example of a freeform object reconstruction at different levels of details obtained by modifying the fitting parameters  $(\epsilon, \sigma)$ . Increasing progressively both the fitting tolerance  $\epsilon$  and the minimal primitive size  $\sigma$  gives coarser configurations of planar primitives, and after assembling, more concise polygon meshes. Tables 1 and 2 provide the values of parameters  $\epsilon$  and  $\sigma$  used for producing the results presented in the paper and this supplementary material.

### 3. Comparisons with compact mesh reconstruction methods

We compared our algorithm with seven compact mesh reconstruction methods on the KSR42 dataset by following the evaluation protocol of [1]. In particular, we considered as evaluation metrics the symmetric mean Hausdorff distance between input points and output mesh, the mean Hausdorff distance from input points to output mesh and the mesh simplicity given by the number of polygonal facets.

The seven methods include three compact mesh reconstruction methods (Polyfit [6], Chauve’s algorithm [2] and KSR [1]) and four surface approximation pipelines where a

dense mesh is first reconstructed from input points by the Screened Poisson algorithm before being simplified either by the edge collapse method QEM [4], by variational shape approximation VSA [3], by plane-guided mesh decimation SAMD [9] or by an alternative of the latter with corner preservation SAMD-CP. The Screened Poisson algorithm was used with an octree depth set to 9.

Tables 5 and 6 provide quantitative results on respectively the simple and advanced models of the KSR42 dataset. Our algorithm outperforms the other methods on both the accuracy and the mesh simplicity in most of simple and advanced models. On a few models such as *Building C*, the KSR algorithm performs better: it typically corresponds to regular scenes where the planar primitives detected by Region Growing have been consolidated according to parallelism and orthogonality regularities before assembling. Such geometric prior offers an advantage to KSR on such particular scenes by reducing the number of detected planar primitives. Yet, our algorithm gives better results on a large majority of models, showing that our primitive detection algorithm is more efficient than the traditional Region Growing used by the KSR algorithm. Figures 3, 4, 5 and 6 show visual comparisons on the simple models. Similarly, Figures 7, 8, 9 and 10 focus on advanced models. Note that Polyfit [6] and Chauve’s algorithm [2] do not scale well enough to produce results on advanced models.

### 4. Choice of the fidelity metric

While fidelity is measured through the traditional Euclidean distance from point to plane in the paper, other metrics can be considered. Normal deviation can be an option when input normals are available or can be accurately estimated. Tables 3 and 4, which are an enriched version of Tab.1 and 2 of the paper, show quantitative results from two fidelity metrics: the traditional Euclidean distance used in the paper and the normal deviation. They are used as both evaluation score and metric in the energy (i.e. in Eq.2 of the paper). As expected, fidelity score is lower when computed with the same metric in the energy. However, the other fi-

delity score remains competitive with respect to the values from existing methods.

| Model                | #pts | $\sigma$ (%) | diag  | $\epsilon$ |
|----------------------|------|--------------|-------|------------|
| Sphere (Fig.1)       | 100K | 0.2          | 3.5   | 0.008      |
| Torus (Fig.3)        | 146K | 0.034        | 11.5  | 0.04       |
| Barn (Fig.5)         | 619K | 0.048        | 8.9   | 0.04       |
| Meeting room (Fig.5) | 3M   | 0.003        | 22.9  | 0.02       |
| Wave (Fig.7)         | 2.9M | 0.003        | 222.6 | 0.20       |
| Trex-Skul (Fig.7)    | 788K | 0.012        | 194   | 0.20       |
| Indoor Scene (Fig.7) | 5M   | 0.006        | 187.8 | 0.40       |
| Sappho head (Fig.7)  | 1.5M | 0.003        | 129.5 | 0.40       |
| Family (Fig.7)       | 1.1M | 0.002        | 3.9   | 0.016      |
| Urban (Fig.7)        | 4.6M | 0.005        | 968.7 | 0.50       |
| Torus (Fig.8)        | 146K | 0.034        | 11.5  | 0.03       |
| Eraser ball (Fig.8)  | 728K | 0.021        | 3.0   | 0.005      |
| Bunny (Fig.8)        | 146K | 0.034        | 0.25  | 0.001      |
| Lamp (Fig.9)         | 290K | 0.017        | 1.0   | 0.001      |
| Airplane (Fig.9)     | 731K | 0.007        | 1.0   | 0.002      |
| Table (Fig.9)        | 737K | 0.007        | 1.0   | 0.004      |
| Chair (Fig.9)        | 293K | 0.010        | 1.0   | 0.004      |

Table 1. Parameters ( $\epsilon, \sigma$ ) used for producing the results illustrated in the paper. The size of input points (#pts) ranges from 100K to 5M. The minimal primitive size  $\sigma$  is expressed in percent of #pts. The fitting tolerance  $\epsilon$  is expressed in the unit system of the input point clouds. *diag* refers to the length of the bounding box diagonal of the input point clouds.

| Model               | #pts | $\sigma$ (%) | diag  | $\epsilon$ |
|---------------------|------|--------------|-------|------------|
| Francis statue      | 2.0M | 0.01         | 6.6   | 0.05       |
| curved Hilbert cube | 1.0M | 0.005        | 51.9  | 0.21       |
| Earth globe         | 1.4M | 0.004        | 93.6  | 0.20       |
| House triplet       | 900K | 0.011        | 67.9  | 0.12       |
| Engine              | 1.5M | 0.001        | 207.9 | 0.10       |
| Observatory         | 246K | 0.008        | 116.5 | 0.80       |
| Vase                | 731K | 0.007        | 115.8 | 0.90       |
| Carter              | 193K | 0.026        | 165.2 | 0.66       |
| Owl statue          | 1.5M | 0.001        | 182.3 | 0.07       |
| M-W building        | 3.0M | 0.005        | 67.5  | 0.35       |
| Train               | 1.5M | 0.010        | 11.4  | 0.005      |
| Building Blocks     | 1.5M | 0.013        | 210.5 | 0.90       |
| Mechanical system   | 1.1M | 0.005        | 303.1 | 1.00       |
| basic House         | 868K | 0.046        | 32.7  | 0.20       |
| Chair               | 204K | 0.010        | 749.4 | 3.50       |
| large House         | 2.6M | 0.008        | 46.7  | 0.30       |

Table 2. Parameters ( $\epsilon, \sigma$ ) used for producing the results illustrated in Figure 1 of this supplementary material.

|     |             | Fid. $L_2$  | Fid. normal | Compl.      | Simpl.       |
|-----|-------------|-------------|-------------|-------------|--------------|
| KSR | RG [8]      | 0.39        | 13.8        | 83.6        | 654.2        |
|     | SRG [7]     | 0.43        | 13.8        | 83.9        | 612.7        |
|     | RANSAC [10] | 0.42        | 16.7        | 83.3        | 684.7        |
|     | Ours- $L_2$ | <b>0.33</b> | 13.3        | 84.1        | 572.4        |
|     | Ours-normal | 0.4         | <b>12.8</b> | <b>84.2</b> | <b>504.8</b> |
| ABC | RG [8]      | 0.28        | 10.3        | 97.6        | 69           |
|     | SRG [7]     | 0.30        | 10.6        | 97.1        | 65           |
|     | RANSAC [10] | 0.21        | 10.6        | 97.7        | 55.5         |
|     | Ours- $L_2$ | <b>0.19</b> | 11.8        | <b>97.9</b> | <b>39.4</b>  |
|     | Ours-normal | 0.27        | <b>9.9</b>  | <b>97.9</b> | 41.6         |

Table 3. Comparison with traditional methods using two different fidelity metrics. The table is an enriched version of Tab.1 of the paper with an average normal deviation score (Fid. normal, in degree) and with a variant of our algorithm using a normal deviation based metric (Ours-normal).

|       |               | Fid. $L_2$   | Fid. normal | Compl.      | Simpl.     |
|-------|---------------|--------------|-------------|-------------|------------|
| ABC*  | SPFN [5]      | 2.835        | 29.7        | 90.0        | 12.2       |
|       | ParSeNet [11] | 0.410        | 10.9        | 99.1        | 8.8        |
|       | HPNet [12]    | 0.224        | 8.9         | 96.8        | <b>8.3</b> |
|       | Ours- $L_2$   | 0.130        | 4.4         | 99.8        | <b>8.3</b> |
|       | Ours-normal   | <b>0.026</b> | <b>1.6</b>  | <b>99.9</b> | 8.8        |
| ANSI* | SPFN [5]      | 0.760        | 20.1        | 95.5        | 12.1       |
|       | ParSeNet [11] | 1.064        | 31.8        | 91.0        | <b>9.0</b> |
|       | HPNet [12]    | 0.087        | 9.9         | 83.0        | 13.3       |
|       | Ours- $L_2$   | <b>0.085</b> | 7.7         | 95.5        | 9.7        |
|       | Ours-normal   | 0.097        | <b>6.3</b>  | <b>99.2</b> | 12.1       |

Table 4. Comparison with deep learning methods using two different fidelity metrics. The table is an enriched version of Tab.2 of the paper with an average normal deviation score (Fid. normal, in degree) and with a variant of our algorithm using a normal deviation based metric (Ours-normal).

## References

- [1] Jean-Philippe Bauchet and Florent Lafarge. Kinetic shape reconstruction. *Trans. on Graphics*, 39(5), 2020. **1**
- [2] Anne-Laure Chauve, Patrick Labatut, and Jean-Philippe Pons. Robust piecewise-planar 3D reconstruction and completion from large-scale unstructured point data. In *CVPR*, 2010. **1, 6**
- [3] David Cohen-Steiner, Pierre Alliez, and Mathieu Desbrun. Variational shape approximation. In *SIGGRAPH*, 2004. **1**
- [4] Michael Garland and Paul S. Heckbert. Surface simplification using quadric error metrics. In *SIGGRAPH*, 1997. **1**
- [5] Lingxiao Li, Minhyuk Sung, Anastasia Dubrovina, Li Yi, and Leonidas J Guibas. Supervised fitting of geometric primitives to 3d point clouds. In *CVPR*, 2019. **2**
- [6] Liangliang Nan and Peter Wonka. Polyfit: Polygonal surface reconstruction from point clouds. In *ICCV*, 2017. **1, 6**
- [7] Sven Oesau, Yannick Verdie, Clément Jamin, Pierre Alliez, Florent Lafarge, Simon Giraudot, Thien Hoang, and Dmitry Anisimov. Point set shape detection. In *CGAL User and Reference Manual*. 5.3 edition, 2021. **2**

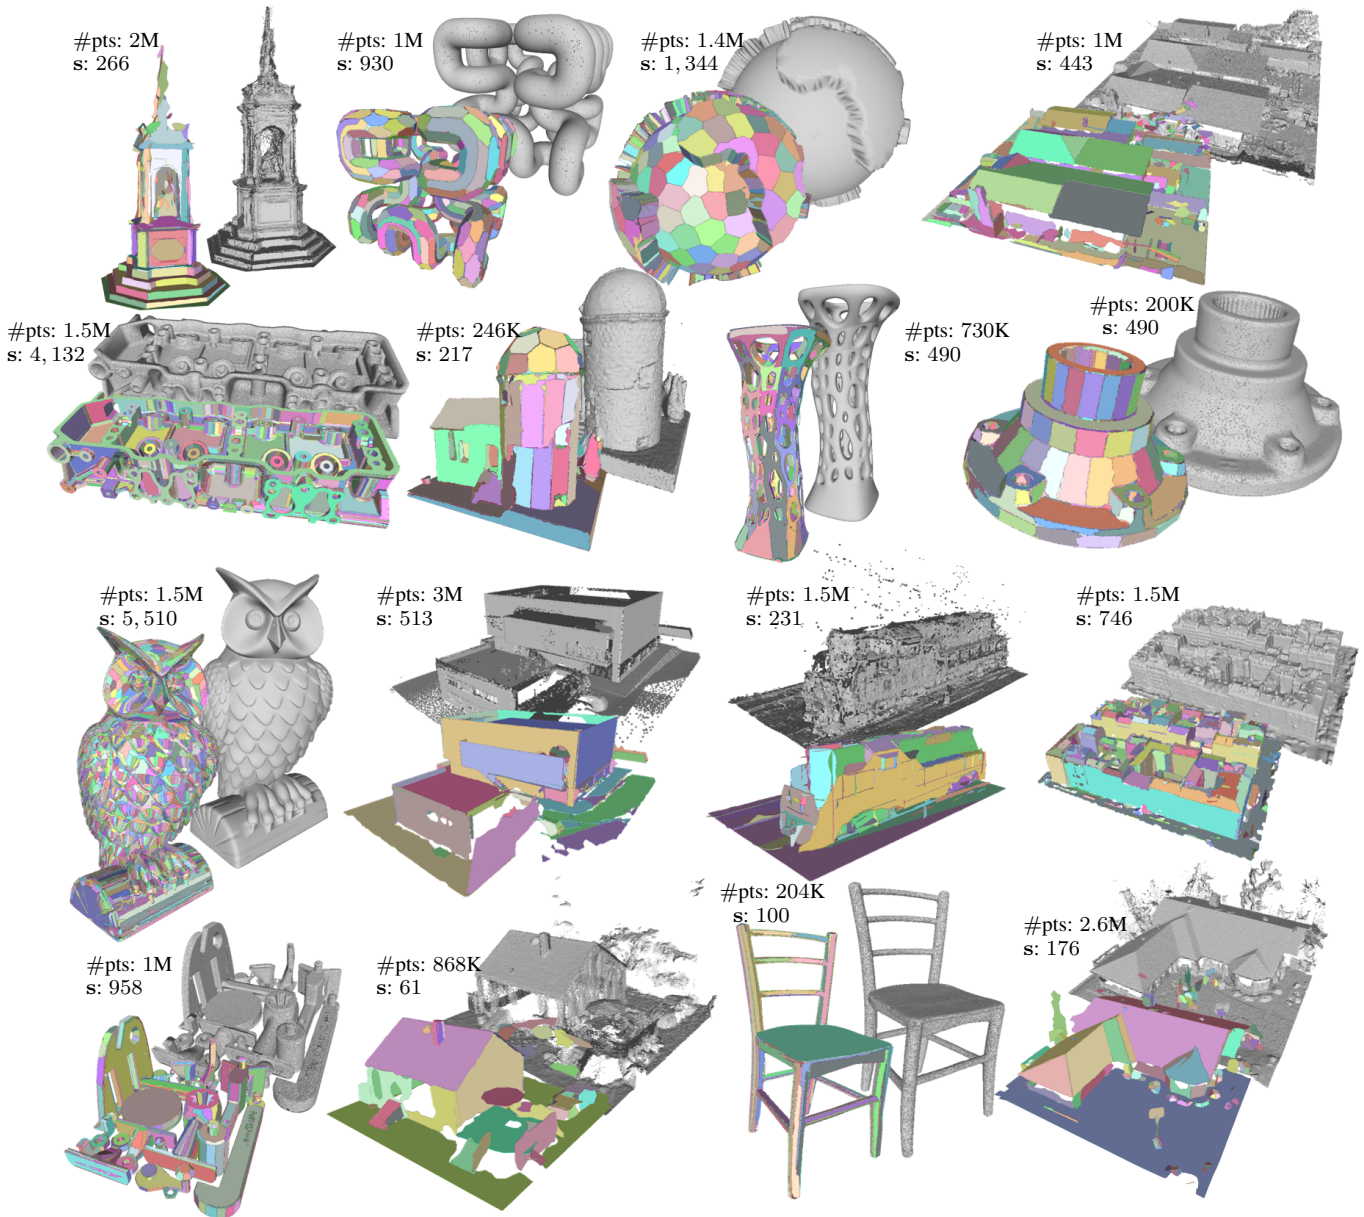

Figure 1. Visual results on a variety of input point clouds. From left to right, and top to bottom: Francis statue (MVS), curved Hilbert cube (CAD-based), Earth globe (CAD-based), residential House triplet (MVS), Engine (Laser), Observatory (MVS), Vase (Laser), Carter (Laser), Owl statue (Laser), Manhattan-World building (Laser), Train (MVS), Building Blocks (MVS), Mechanical system (CAD-based), basic House (MVS), Chair (Laser) and large House (MVS). #pts and s refer to the number of input points and the number of detected primitives respectively.

- [8] Tahir Rabbani, Frank Van Den Heuvel, and George Vosselman. Segmentation of point clouds using smoothness constraint. *International archives of photogrammetry, remote sensing and spatial information sciences*, 36(5), 2006. 2
- [9] David Salinas, Florent Lafarge, and Pierre Alliez. Structure-Aware Mesh Decimation. *Computer Graphics Forum*, 34(6), 2015. 1
- [10] Ruwen Schnabel, Roland Wahl, and Reinhard Klein. Efficient ransac for point-cloud shape detection. *Computer graphics forum*, 26(2), 2007. 2
- [11] Gopal Sharma, Difan Liu, Subhransu Maji, Evangelos Kalogerakis, Chaudhuri, and Radomyr Mech. Parsenet: A parametric surface fitting network for 3d point clouds. In *ECCV*, 2020. 2
- [12] Siming Yan, Zhenpei Yang, Chongyang Ma, Haibin Huang, Etienne Vouga, and Qixing Huang. Hpnet: Deep primitive segmentation using hybrid representations. In *ICCV*. 2

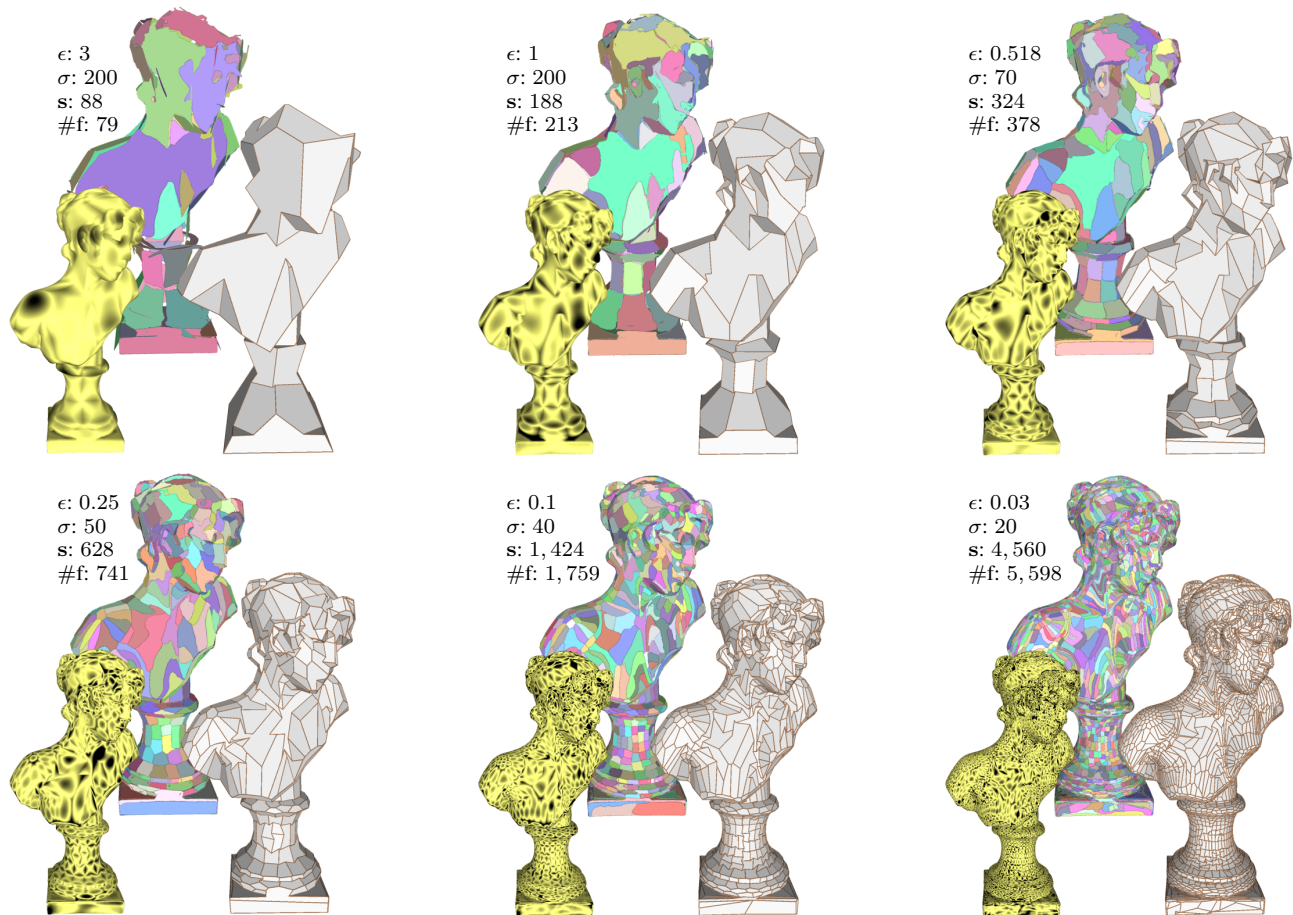

Figure 2. Reconstruction of a freeform object at different levels of details. By progressively decreasing the fitting parameters ( $\epsilon, \sigma$ ), our algorithm outputs a series of more and more accurate and complex planar primitive configurations (colored polygons, from left to right, and top to bottom). When combined with a plane assembly method, it produces polygon meshes at different levels details.  $s$  and  $\#f$  refer to the number of primitives and the number of polygonal facets of the reconstructed mesh respectively. The colored point clouds show the distribution of the Hausdorff distance of input points to output mesh normalized by  $\epsilon$  (yellow=0, black $\geq \epsilon$ ).



|            |       | Barn MVS | Building A | Building B | Building C | Bunny | Chair | Cottage | Couch | Fertility-Coarse | Foam box | Hand  | Lans-Coarse | Rocker arm | Rooms A | Rooms B | Temple |
|------------|-------|----------|------------|------------|------------|-------|-------|---------|-------|------------------|----------|-------|-------------|------------|---------|---------|--------|
| Type       |       | U        | U          | U          | U          | F     | S     | U       | S     | F                | S        | F     | U           | S          | I       | I       | S      |
| Origin     |       | MVS      | MVS        | MVS        | MVS        | Laser | Laser | MVS     | Laser | Laser            | Laser    | Laser | Laser       | Laser      | Laser   | Laser   | MVS    |
| # pts      |       | 619K     | 101K       | 73K        | 577K       | 146K  | 756K  | 143K    | 911K  | 242K             | 382K     | 369K  | 1.22M       | 733K       | 186K    | 176K    | 621K   |
| $\epsilon$ |       | 0.75     | 5          | 2.5        | 0.4        | 0.4   | 1.6   | 0.7     | 2.2   | 1.75             | 1.75     | 0.8   | 1           | 1.1        | 0.8     | 0.3     | 1.7    |
| $\sigma$   |       | 0.08     | 0.6        | 0.25       | 1.2        | 0.15  | 0.5   | 0.2     | 0.7   | 0.2              | 0.2      | 0.07  | 0.8         | 0.04       | 0.3     | 0.6     | 0.3    |
| Ours       | $e_A$ | 0.151    | 0.658      | 0.587      | 0.593      | 0.321 | 0.529 | 0.308   | 0.458 | 0.284            | 0.222    | 0.340 | 0.454       | 0.190      | 0.526   | 0.543   | 0.296  |
|            | $e_S$ | 0.128    | 1.053      | 0.663      | 0.442      | 0.441 | 0.557 | 0.441   | 1.667 | 0.434            | 0.258    | 0.395 | 0.827       | 0.312      | 0.468   | 0.503   | 0.446  |
|            | #f    | 40       | 34         | 31         | 38         | 119   | 23    | 34      | 27    | 96               | 66       | 108   | 25          | 73         | 44      | 22      | 79     |
| KSR        | $e_A$ | 0.231    | 0.951      | 0.605      | 0.372      | 0.454 | 0.557 | 0.401   | 0.560 | 0.350            | 0.247    | 0.423 | 0.491       | 0.257      | 0.677   | 0.553   | 0.381  |
|            | $e_S$ | 0.179    | 1.522      | 0.735      | 0.344      | 0.540 | 0.580 | 0.471   | 1.681 | 0.498            | 0.281    | 0.480 | 0.726       | 0.382      | 0.603   | 0.538   | 0.481  |
|            | #f    | 38       | 29         | 23         | 34         | 111   | 23    | 28      | 25    | 95               | 63       | 92    | 25          | 73         | 46      | 26      | 95     |
| Polyfit    | $e_A$ | -        | 1.347      | 2.097      | 0.461      | -     | 1.447 | 1.491   | 6.385 | 0.388            | 0.221    | 0.460 | 3.977       | 0.361      | 0.590   | 0.680   | 0.548  |
|            | $e_S$ | -        | 1.170      | 1.385      | 0.343      | -     | 1.089 | 1.259   | 3.325 | 0.500            | 0.297    | 0.537 | 2.592       | 0.524      | 0.556   | 0.572   | 0.683  |
|            | #f    | -        | 14         | 25         | 30         | -     | 16    | 18      | 17    | 150              | 63       | 98    | 26          | 144        | 51      | 19      | 90     |
| Chauve     | $e_A$ | 1.042    | 9.585      | 2.626      | 0.407      | 0.545 | 1.422 | 1.429   | 3.931 | 0.328            | 0.207    | 0.462 | 0.421       | 0.357      | 0.790   | 0.526   | 0.459  |
|            | $e_S$ | 0.772    | 5.172      | 1.704      | 0.308      | 0.555 | 1.082 | 0.823   | 2.137 | 0.407            | 0.261    | 0.488 | 1.195       | 0.411      | 0.671   | 0.465   | 0.911  |
|            | #f    | 25       | 32         | 103        | 56         | 261   | 25    | 18      | 14    | 528              | 107      | 188   | 36          | 202        | 125     | 54      | 700    |
| SP_QEM     | $e_A$ | 2.815    | 4.081      | 6.344      | 2.873      | 1.435 | 4.287 | 2.373   | 2.922 | 0.722            | 2.969    | 0.724 | 2.814       | 2.124      | 2.847   | 2.871   | 2.127  |
|            | $e_S$ | 1.575    | 2.482      | 3.856      | 1.934      | 1.069 | 3.000 | 1.513   | 1.971 | 0.756            | 1.933    | 0.777 | 1.831       | 1.509      | 1.984   | 1.645   | 1.498  |
|            | #f    | 39       | 28         | 22         | 26         | 110   | 24    | 27      | 25    | 100              | 62       | 92    | 25          | 72         | 46      | 26      | 92     |
| SP_VSA     | $e_A$ | 0.752    | 4.222      | 2.673      | 1.593      | 1.002 | 1.906 | 1.181   | 1.762 | 1.724            | 1.404    | 1.058 | 2.894       | 1.201      | 2.066   | 0.911   | 0.894  |
|            | $e_S$ | 0.538    | 3.107      | 1.921      | 1.316      | 1.031 | 1.664 | 0.958   | 1.806 | 1.287            | 0.960    | 0.918 | 2.355       | 1.091      | 1.422   | 0.704   | 0.806  |
|            | #f    | 717      | 213        | 157        | 947        | 175   | 420   | 528     | 113   | 93               | 682      | 127   | 31          | 83         | 568     | 123     | 270    |
| SP_SAMD-CP | $e_A$ | 1.164    | 1.138      | 0.806      | 0.387      | 1.042 | 1.797 | 1.341   | 1.965 | 0.366            | 2.363    | 0.745 | 0.842       | 0.907      | 0.704   | 0.760   | 1.361  |
|            | $e_S$ | 0.675    | 0.988      | 0.781      | 0.307      | 0.909 | 1.302 | 0.833   | 1.556 | 0.383            | 1.480    | 0.789 | 0.761       | 0.744      | 0.604   | 0.552   | 0.998  |
|            | #f    | 141      | 95         | 92         | 267        | 162   | 40    | 75      | 35    | 352              | 105      | 120   | 102         | 137        | 125     | 98      | 125    |
| SP_SAMD    | $e_A$ | 1.428    | 1.524      | 1.071      | 1.885      | 0.585 | 2.326 | 0.801   | 1.483 | 0.657            | 1.546    | 0.508 | 1.686       | 0.800      | 1.240   | 1.907   | 0.686  |
|            | $e_S$ | 0.902    | 1.059      | 1.240      | 1.359      | 0.820 | 1.394 | 0.776   | 1.840 | 0.907            | 1.481    | 0.806 | 1.721       | 0.971      | 0.940   | 1.186   | 0.766  |
|            | #f    | 39       | 28         | 23         | 32         | 112   | 21    | 29      | 26    | 96               | 64       | 92    | 25          | 72         | 46      | 26      | 93     |

Table 5. Quantitative comparisons on the simple models of the KSR42 dataset. Types of objects include urban (U), freeform (F), indoor (I) and structured (S). Origins of point cloud include multiview stereo (MVS), laser scanning (Laser) and point sampled from CAD models (CAD). The size of input points #pts ranges from 101K to 1.2M points. The fitting tolerance  $\epsilon$  and the minimal primitive size  $\sigma$  are expressed in percent of the bounding box diagonal and in percent of the total number of input points respectively. The evaluation metrics  $e_S$ ,  $e_A$ , #f refer to the symmetric mean Hausdorff error (in % of the bounding box diagonal), the mean Hausdorff error from input points to output model and the number of output facets respectively. Note that the scalability of Polyfit is too low to return a result on Barn MVS and Bunny after several hours of computing.

|            |       | Asian dragon | Castle | Church | Courthouse | Euler | Fertility-Fine | Full thing | Meeting Room | Navis | Tower of Pi |
|------------|-------|--------------|--------|--------|------------|-------|----------------|------------|--------------|-------|-------------|
| Type       |       | F            | U      | I      | U          | I     | F              | S          | I            | I     | F           |
| Origin     |       | Laser        | CAD    | Laser  | Laser      | Laser | Laser          | CAD        | Laser        | Laser | CAD         |
| # pts      |       | 3.6M         | 737K   | 31.1M  | 1.9M       | 2.7M  | 242K           | 1.4M       | 3.1M         | 3.6M  | 2.9M        |
| $\epsilon$ |       | 0.25         | 0.1    | 0.8    | 0.8        | 0.1   | 0.2            | 0.2        | 0.1          | 0.1   | 0.1         |
| $\sigma$   |       | 0.004        | 0.001  | 0.005  | 0.002      | 0.004 | 0.03           | 0.004      | 0.003        | 0.005 | 0.001       |
| Ours       | $e_A$ | 0.057        | 0.002  | 0.372  | 0.088      | 0.057 | 0.046          | 0.060      | 0.197        | 0.055 | 0.013       |
|            | $e_S$ | 0.064        | 0.033  | 0.239  | 0.136      | 0.094 | 0.086          | 0.062      | 0.146        | 0.048 | 0.031       |
|            | #f    | 3210         | 748    | 387    | 2157       | 1118  | 831            | 1788       | 1449         | 546   | 12749       |
| KSR        | $e_A$ | 0.065        | 0.006  | 0.460  | 0.134      | 0.069 | 0.061          | 0.064      | 0.198        | 0.061 | 0.020       |
|            | $e_S$ | 0.069        | 0.038  | 0.292  | 0.183      | 0.108 | 0.095          | 0.064      | 0.146        | 0.057 | 0.039       |
|            | #f    | 3132         | 711    | 394    | 1795       | 1317  | 998            | 1807       | 1491         | 457   | 12059       |
| SP_QEM     | $e_A$ | 0.071        | 0.044  | 0.292  | 0.155      | 0.148 | 0.082          | 0.170      | 0.299        | 0.167 | 0.135       |
|            | $e_S$ | 0.072        | 0.082  | 0.345  | 0.245      | 0.237 | 0.117          | 0.141      | 0.204        | 0.146 | 0.098       |
|            | #f    | 3132         | 712    | 394    | 1795       | 1318  | 1000           | 1806       | 1490         | 458   | 12050       |
| SP_VSA     | $e_A$ | 0.125        | 0.098  | 0.569  | 0.254      | 0.242 | 0.183          | 0.378      | 0.202        | 0.192 | 0.295       |
|            | $e_S$ | 0.108        | 0.110  | 0.377  | 0.262      | 0.240 | 0.243          | 0.245      | 0.160        | 0.164 | 0.241       |
|            | #f    | 3351         | 1894   | 494    | 1818       | 4070  | 982            | 4368       | 4949         | 522   | 27285       |
| SP_SAMD-CP | $e_A$ | 0.114        | 0.065  | 0.187  | 0.154      | 0.169 | 0.150          | 0.117      | 0.330        | 0.098 | 0.104       |
|            | $e_S$ | 0.101        | 0.078  | 0.214  | 0.195      | 0.166 | 0.152          | 0.094      | 0.215        | 0.079 | 0.110       |
|            | #f    | 3672         | 1600   | 1924   | 1835       | 1450  | 1709           | 10046      | 1552         | 1898  | 30654       |
| SP_SAMD    | $e_A$ | 0.088        | 0.073  | 0.238  | 0.113      | 0.128 | 0.128          | 0.371      | 0.185        | 0.113 | 0.194       |
|            | $e_S$ | 0.094        | 0.095  | 0.274  | 0.223      | 0.199 | 0.163          | 0.258      | 0.168        | 0.114 | 0.205       |
|            | #f    | 3132         | 733    | 396    | 1800       | 1318  | 999            | 1809       | 1491         | 457   | 12060       |

Table 6. Quantitative results on advanced models. Note that Polyfit [6] and Chauve’s algorithm [2] do not scale well enough to produce results on advanced models.

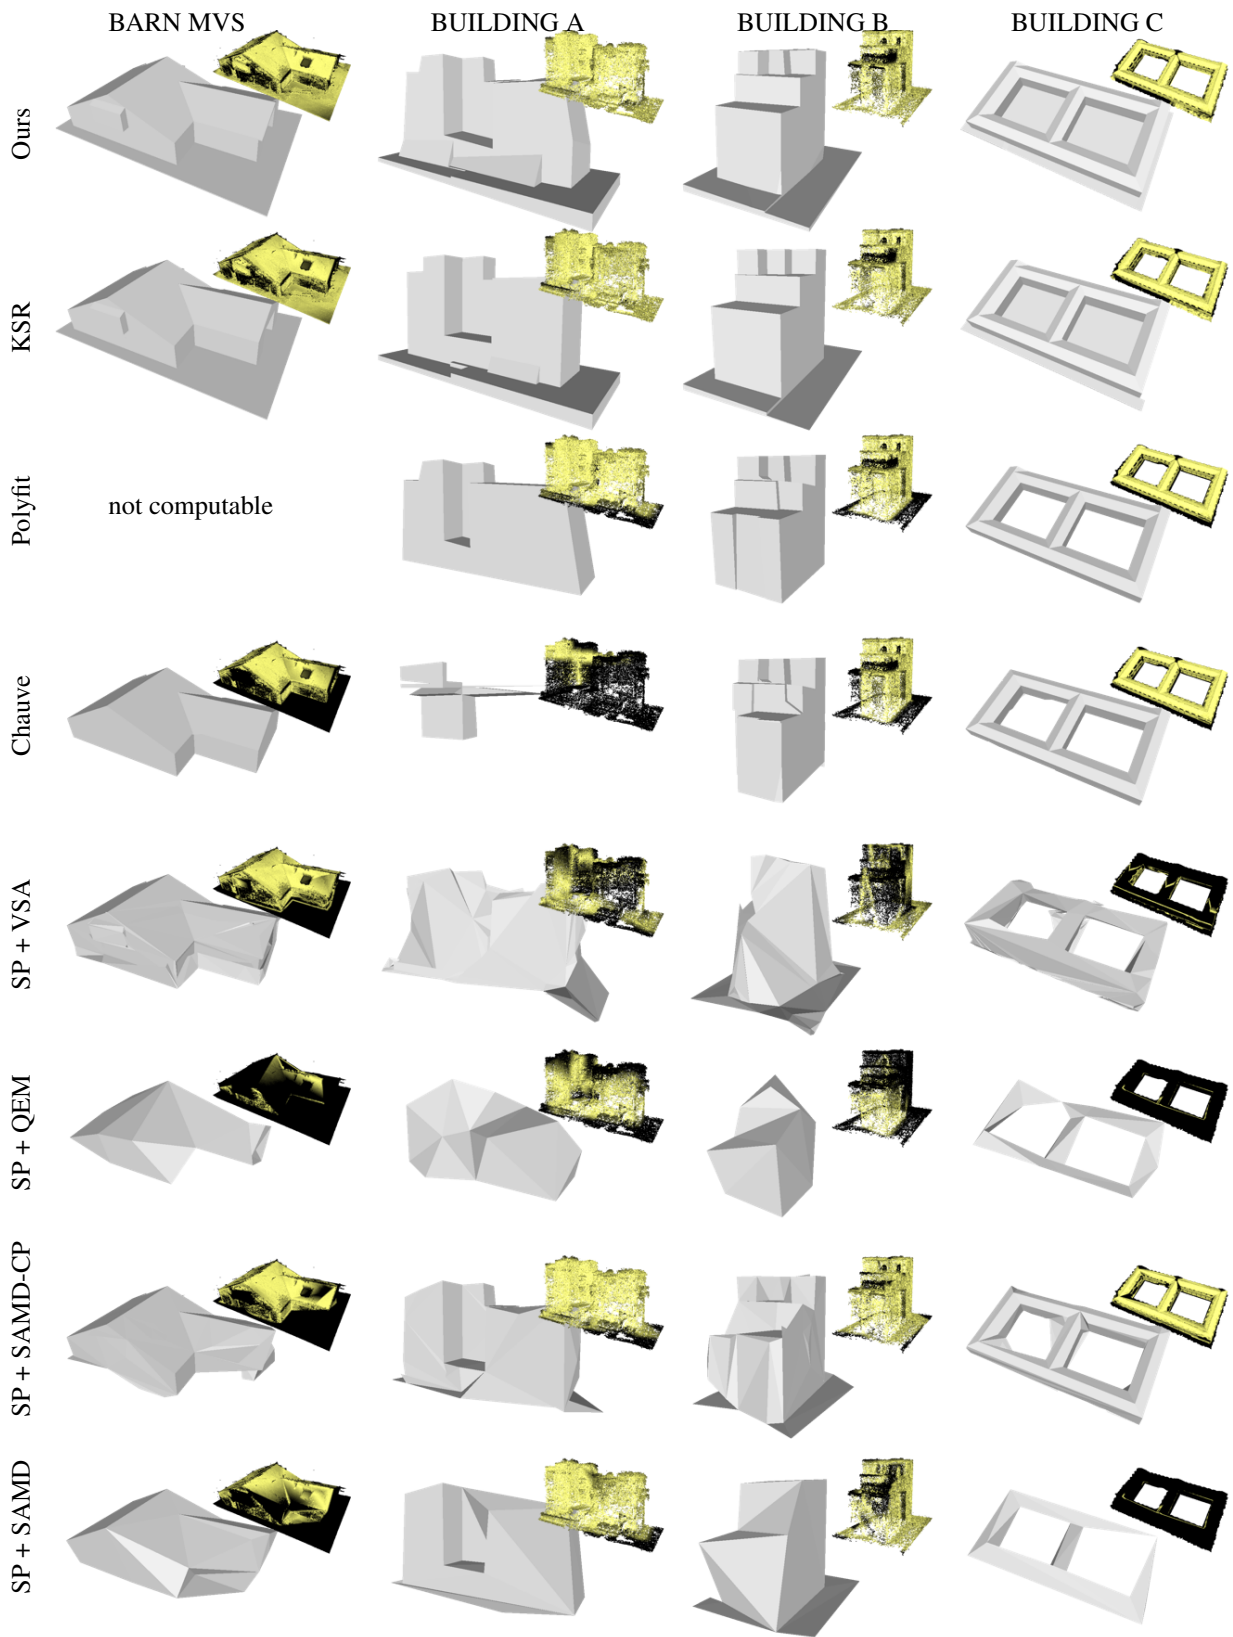

Figure 3. Visual comparisons on simple models (part 1/4). The colored point clouds correspond to the distribution of the Hausdorff distance from input points to output models (yellow=0, black $\geq \epsilon$ ). Evaluation scores associated with these results are given in Table 5.

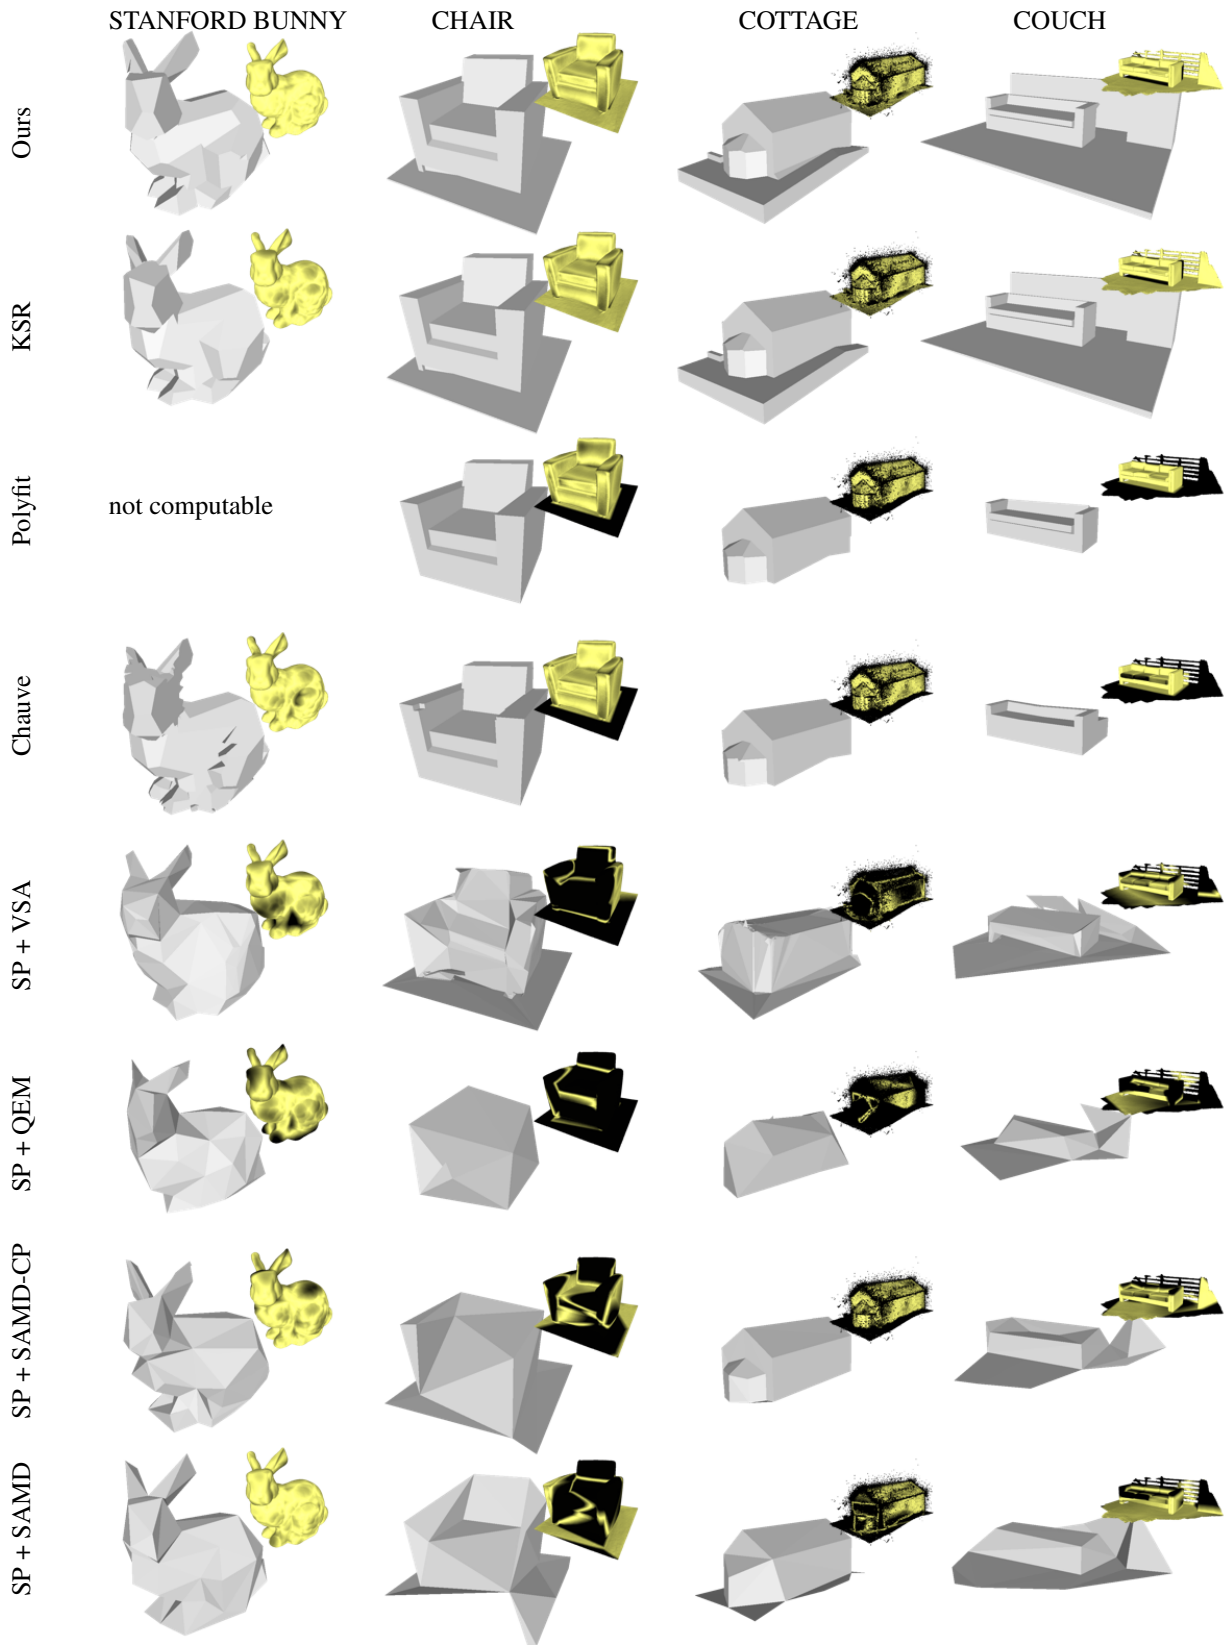

Figure 4. Visual comparisons on simple models (part 2/4).



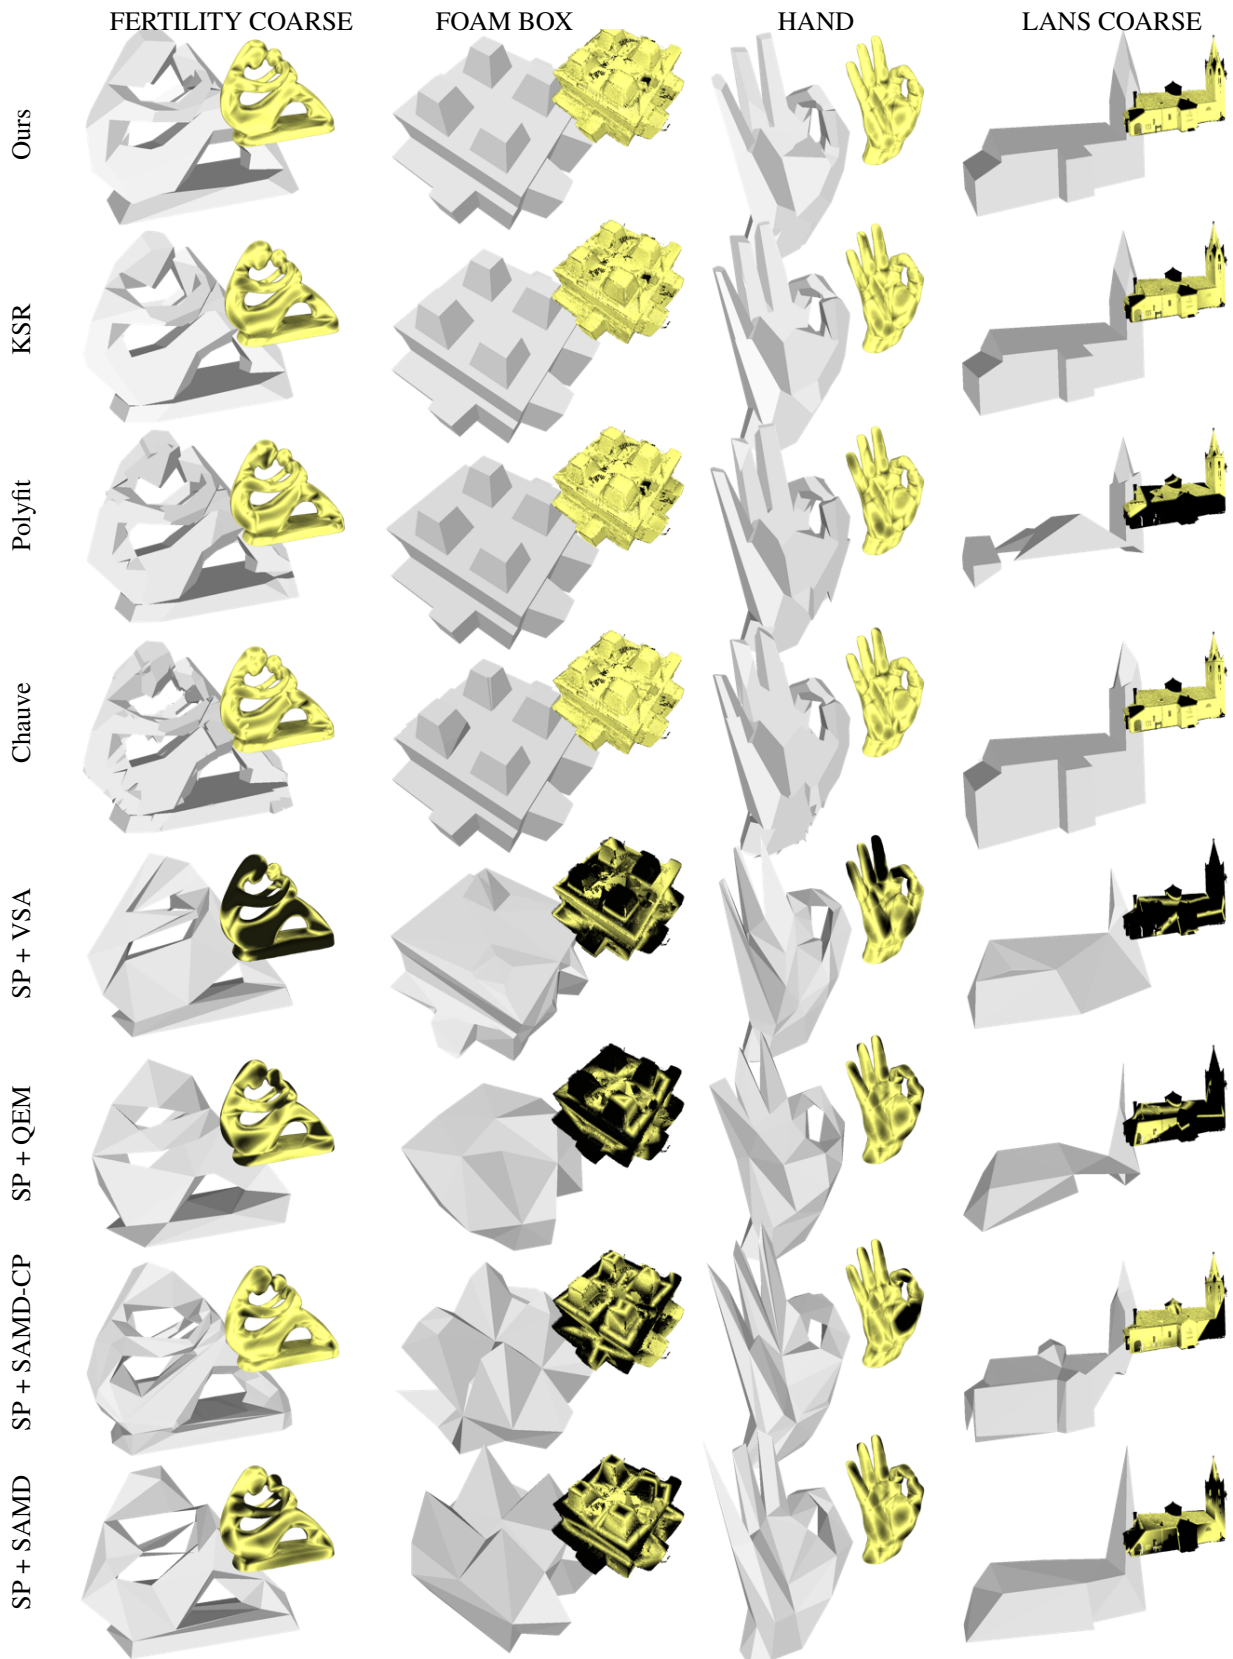

Figure 5. Visual comparisons on simple models (part 3/4).

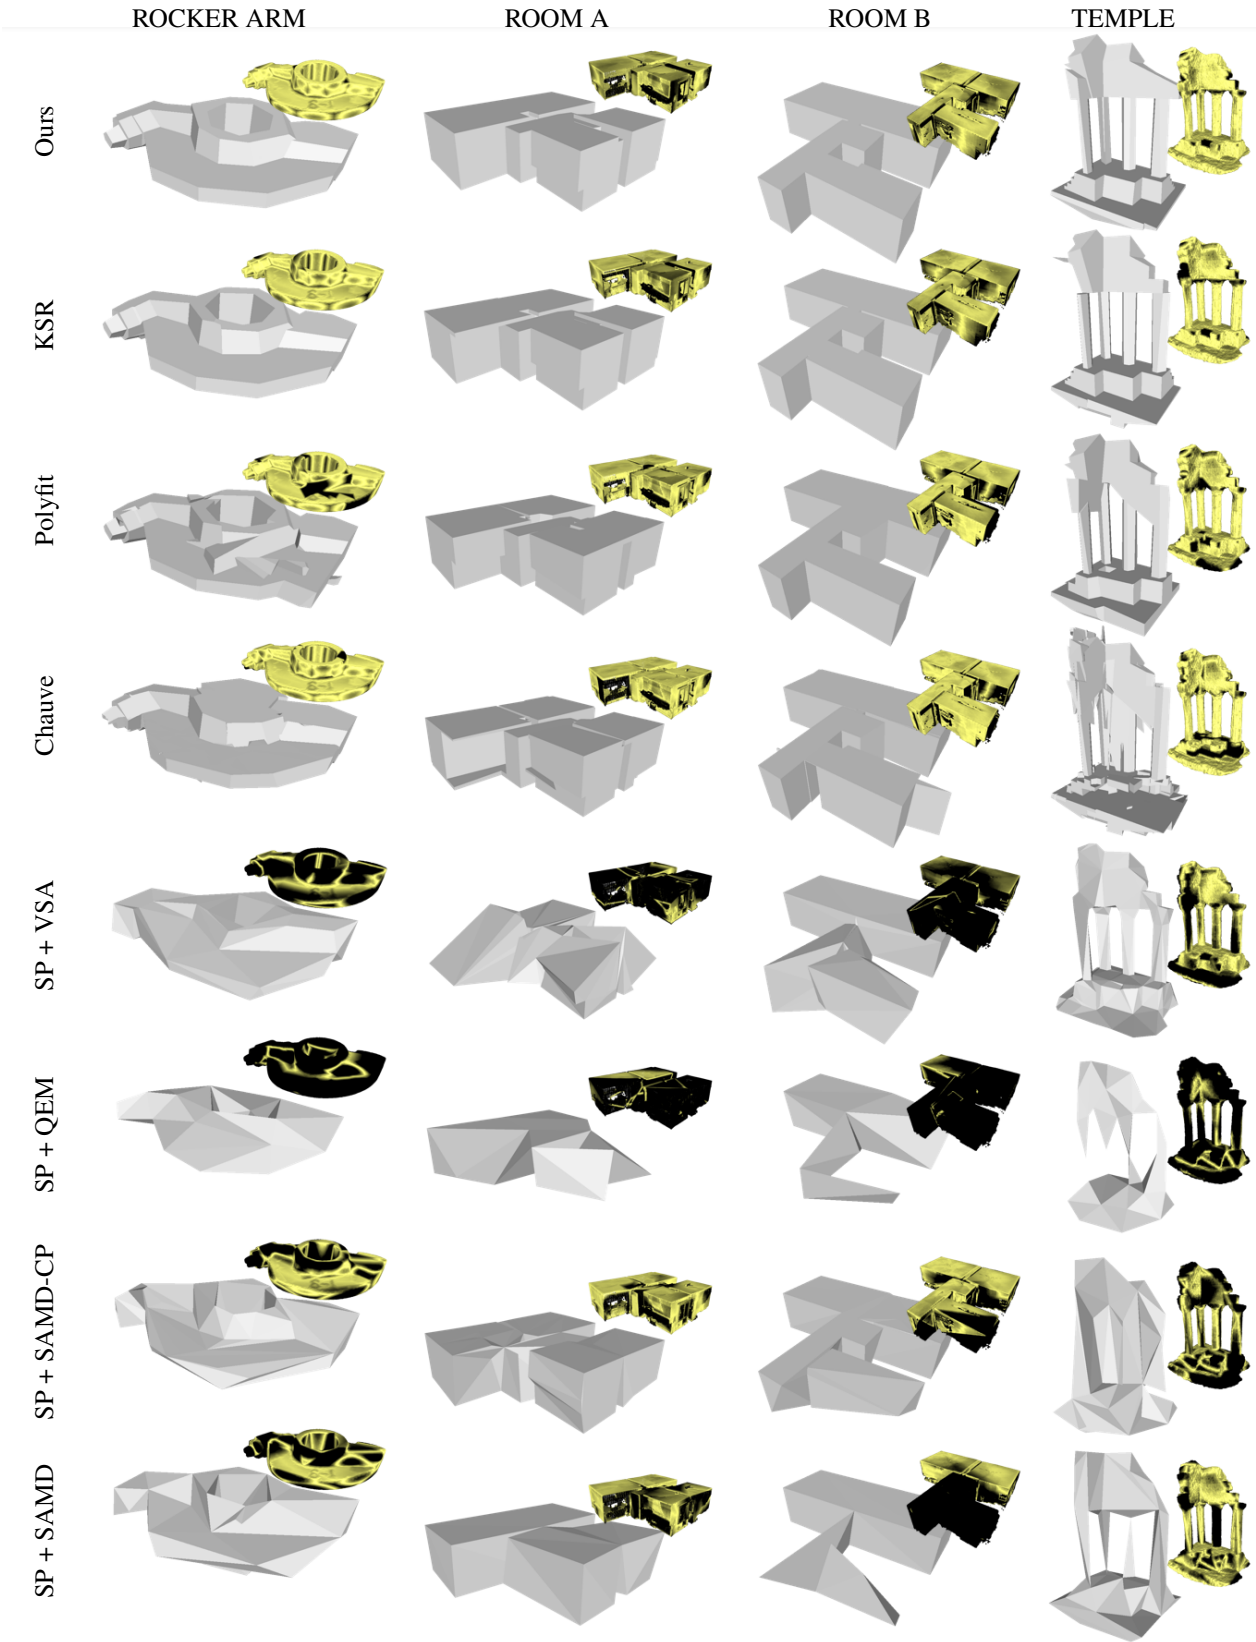

Figure 6. Visual comparisons on simple models (part 4/4).

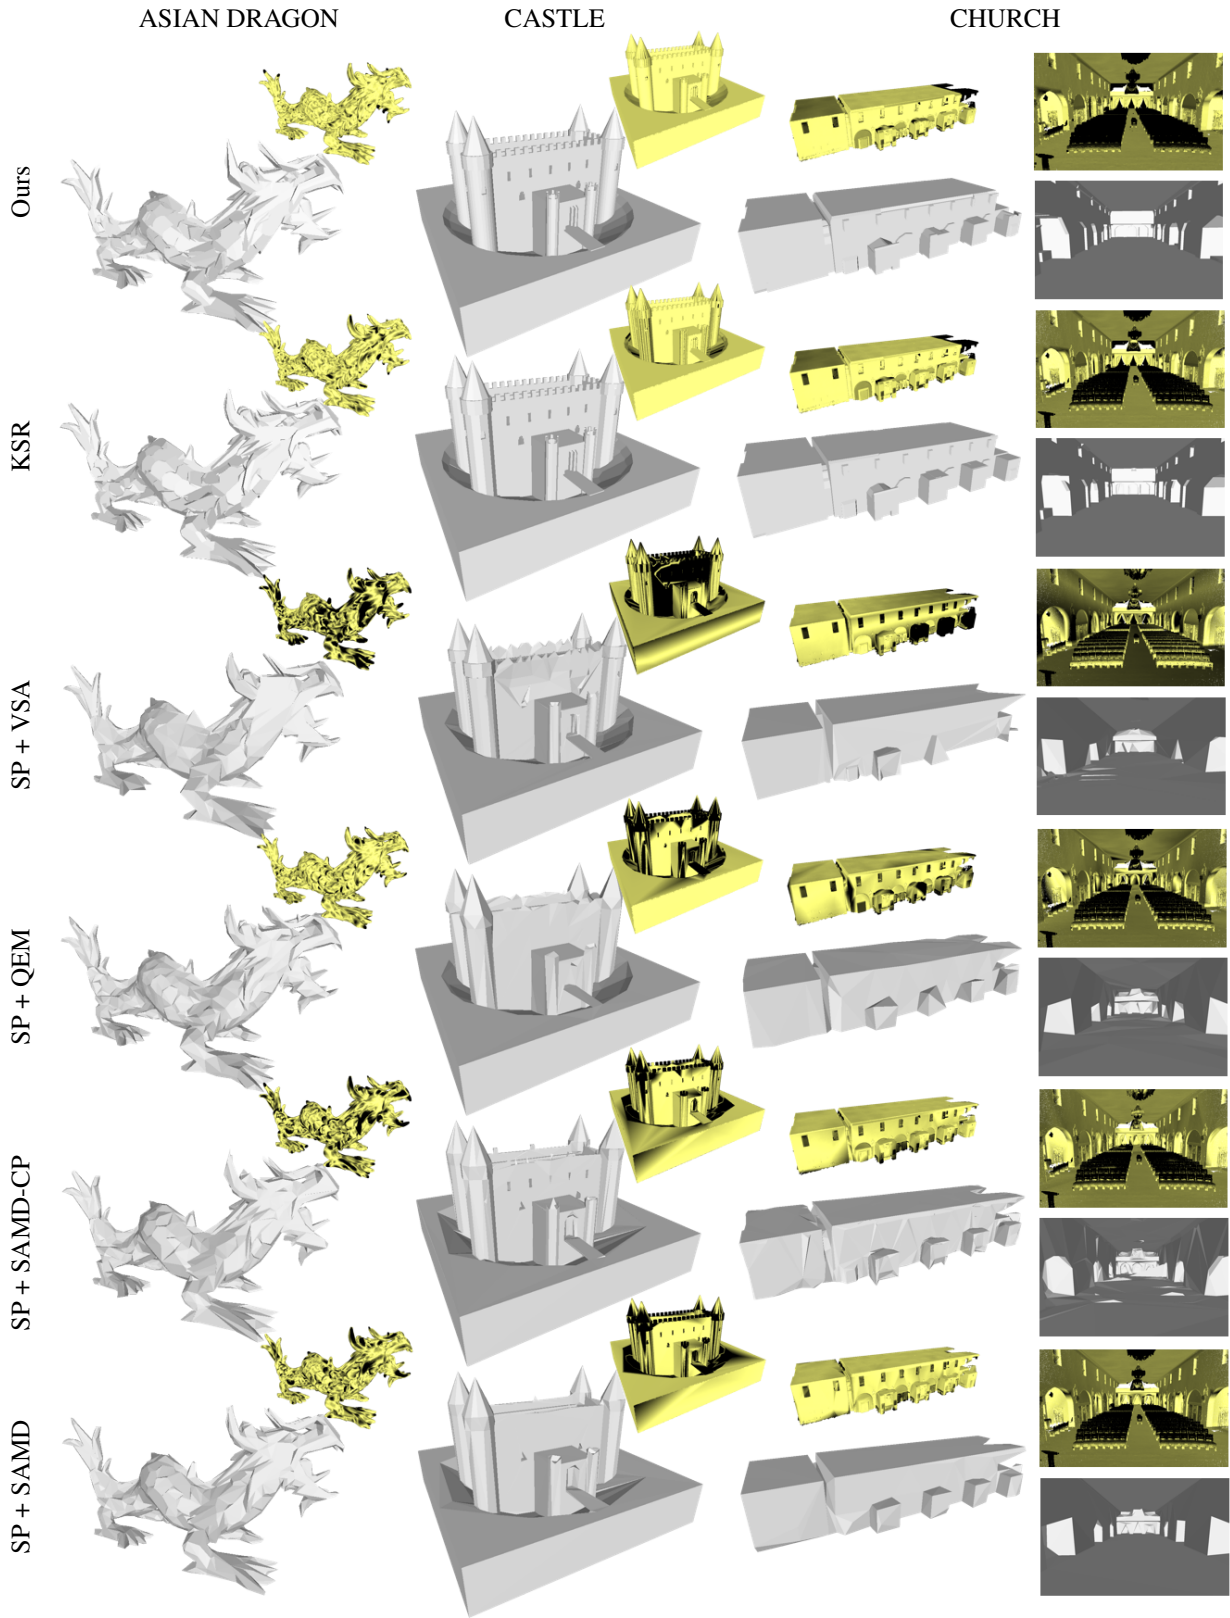

Figure 7. Visual comparisons on advanced models (part 1/4). Evaluation scores associated with these results are given in Table 6.

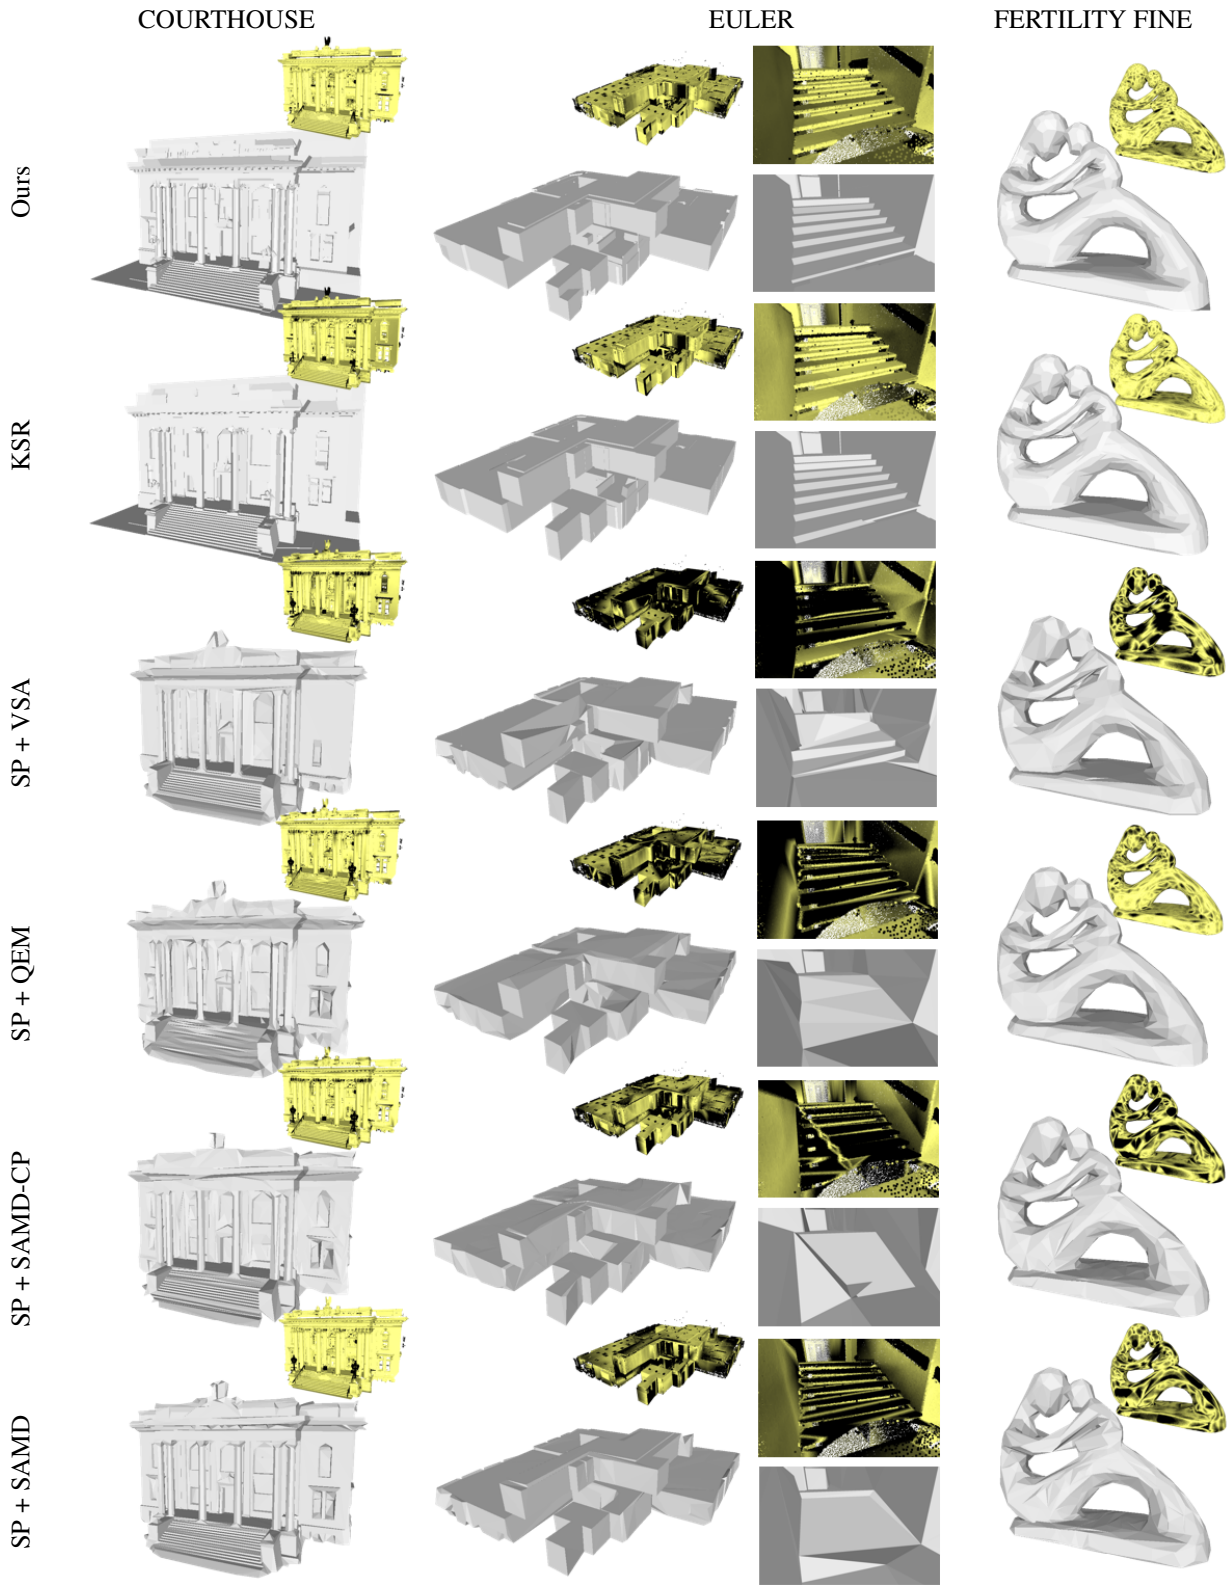

Figure 8. Visual comparisons comparisons on advanced models (part 2/4).



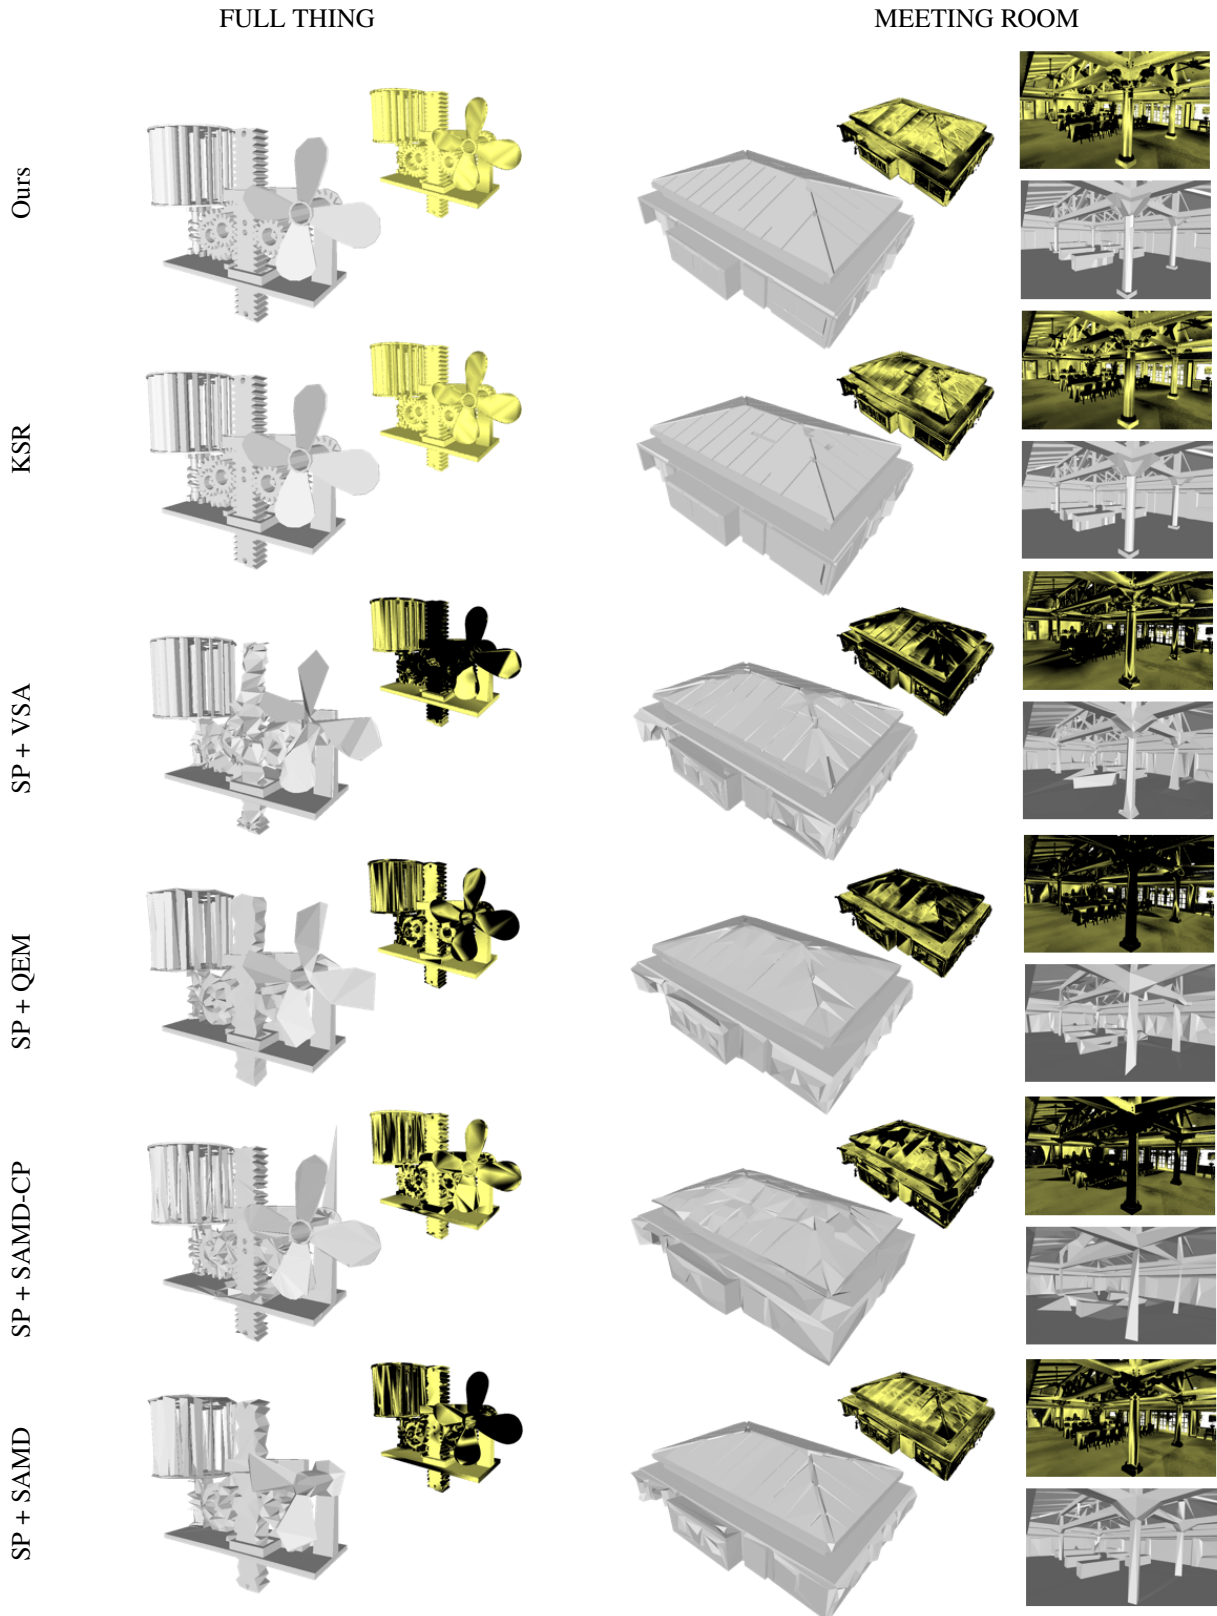

Figure 9. Visual comparisons on advanced models (part 3/4).

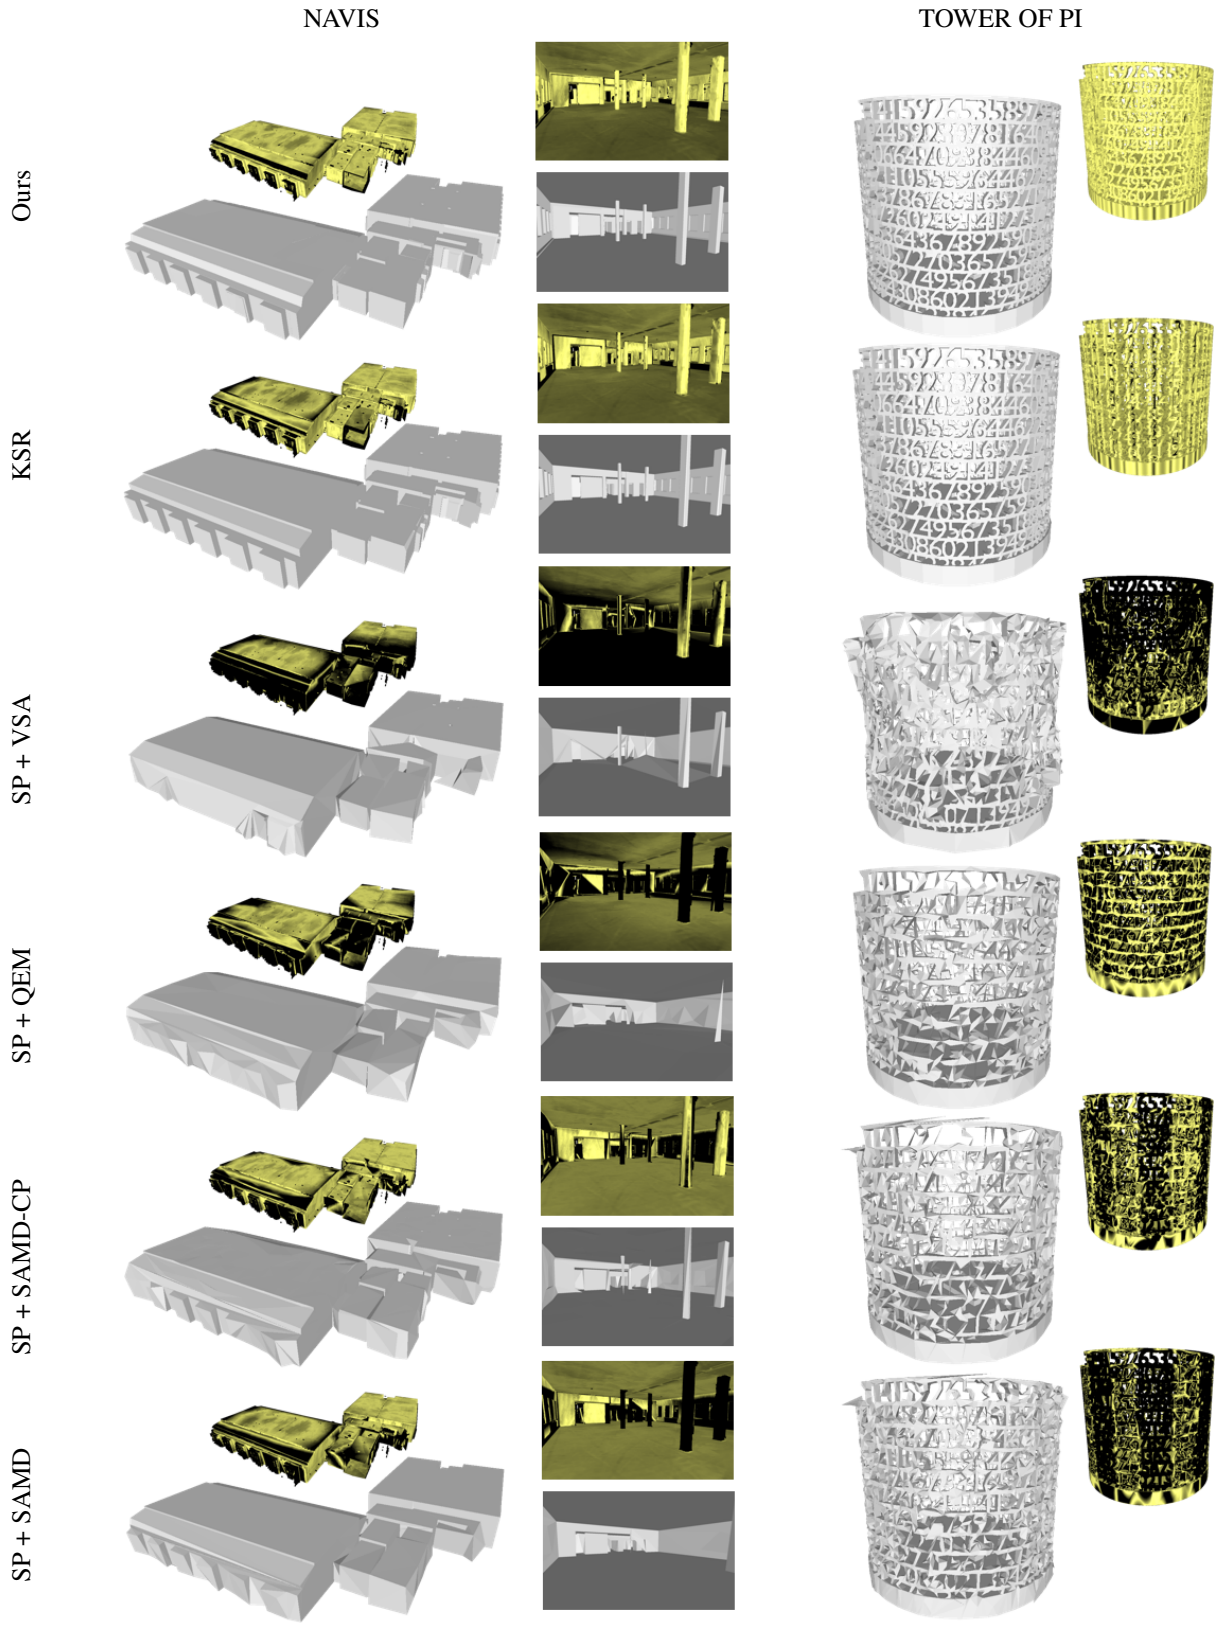

Figure 10. Visual comparisons on advanced models (part 4/4).
